# Supplementary material for: Comparative Chloroplast Genomes and Phylogenetic Analyses of Zanthoxylum L. Provide Insights into Species Delimitation and Phylogenetic Relationships
Source: Research Square preprint supplement (doi:10.21203/rs.3.rs-2188002/v1), 2022-11-14
Supplement: Supplementary file 1 [file 0558f012a488cf1b85278f3f.xlsx]

## Sheet: T S6
Table S1. Taxonomic and accession information for samples used in the study.
Taxon	Order, Family	GenBank Number
Zanthoxylum bungeanum	Rutales, Rutaceae	MW206786
Zanthoxylum piasezkil	Rutales, Rutaceae	MW206785
Zanthoxylum armatum	Rutales, Rutaceae	MW602887
Zanthoxylum nitidum	Rutales, Rutaceae	MW602879
Zanthoxylum ailanthoides	Rutales, Rutaceae	MW478808
Zanthoxylum bungeanum var. punctatum	Rutales, Rutaceae	MW246146
Zanthoxylum stipitatum	Rutales, Rutaceae	MW246147
Zanthoxylum simulans	Rutales, Rutaceae	NC-037482
Zanthoxylum piperitum	Rutales, Rutaceae	NC-027939
Zanthoxylum motuoense	Rutales, Rutaceae	MT990981
Zanthoxylum acanthopodium	Rutales, Rutaceae	NC-051878
Zanthoxylum nitidum var. tomentosum	Rutales, Rutaceae	MN241098
Zanthoxylum tragodes	Rutales, Rutaceae	NC-046747
Zanthoxylum calcicola	Rutales, Rutaceae	MT990983
Zanthoxylum multijugum	Rutales, Rutaceae	MT990982
Zanthoxylum oxyphyllum	Rutales, Rutaceae	MT990980
Zanthoxvlum schinifolium	Rutales, Rutaceae	NC-030702
Zanthoxylum pinnatum	Rutales, Rutaceae	NC-046746
Zanthoxylum madagascariense	Rutales, Rutaceae	NC-046744
Zanthoxylum paniculatum	Rutales, Rutaceae	NC-046745
Phellodendron chinense	Rutales, Rutaceae	MT916287
Tetradium ruticarpum	Rutales, Rutaceae	MT800757
