# Supplementary material for: Comparative Chloroplast Genomes and Phylogenetic Analyses of Zanthoxylum L. Provide Insights into Species Delimitation and Phylogenetic Relationships
Source: Research Square preprint supplement (doi:10.21203/rs.3.rs-2188002/v1), 2022-11-14
Supplement: Supplementary file 2 [file 1ebfddfa7c4cf80ccb0ca0dc.xlsx]

## Sheet: T S2
Table S3. Codon usage within the chloroplast genomes of five species.
Amino acid	Codon	RSCU					Number
		Z. nitidum	Z. piasezkii	Z. bungeanum	Z.ailanthoides	Z. armatum	Z. nitidum	Z. piasezkii	Z. bungeanum	Z.ailanthoides	Z. armatum
Phe	UUU	1.26	1.27	1.27	1.26	1.26	962	951	958	930	957
Phe	UUC	0.74	0.73	0.73	0.74	0.74	564	551	556	542	557
Leu	UUA	1.74	1.74	1.75	1.76	1.74	814	813	819	805	817
Leu	UUG	1.25	1.24	1.24	1.24	1.25	587	579	583	570	588
Leu	CUU	1.26	1.26	1.26	1.28	1.26	592	590	589	585	592
Leu	CUC	0.46	0.45	0.44	0.44	0.45	214	210	208	200	212
Leu	CUA	0.86	0.87	0.87	0.85	0.86	403	408	406	391	404
Leu	CUG	0.43	0.44	0.44	0.44	0.44	204	206	208	200	209
Ile	AUU	1.45	1.45	1.45	1.46	1.45	1079	1075	1076	1054	1079
Ile	AUC	0.64	0.64	0.64	0.64	0.64	478	470	471	460	475
Ile	AUA	0.9	0.91	0.91	0.91	0.91	672	675	674	655	676
Met	AUG	1	1	1	1	1	615	622	614	607	618
Val	GUU	1.48	1.46	1.47	1.48	1.47	526	519	522	517	522
Val	GUC	0.53	0.54	0.54	0.53	0.54	188	192	192	185	191
Val	GUA	1.42	1.42	1.41	1.43	1.42	506	503	502	500	504
Val	GUG	0.58	0.58	0.58	0.57	0.58	206	204	206	200	206
Ser	UCU	1.6	1.62	1.6	1.6	1.61	544	548	543	530	548
Ser	UCC	1	1	1	1.02	1	340	339	339	337	340
Ser	UCA	1.14	1.14	1.15	1.14	1.14	389	385	389	379	388
Ser	UCG	0.68	0.67	0.67	0.65	0.67	233	225	228	217	228
Ser	AGU	1.19	1.19	1.2	1.19	1.2	406	401	408	396	407
Ser	AGC	0.39	0.39	0.39	0.4	0.38	134	131	131	132	129
Pro	CCU	1.46	1.44	1.44	1.44	1.42	398	394	394	387	389
Pro	CCC	0.84	0.86	0.86	0.88	0.87	230	235	235	236	239
Pro	CCA	1.18	1.18	1.17	1.16	1.18	322	321	319	313	323
Pro	CCG	0.52	0.52	0.53	0.52	0.52	143	142	145	139	143
Thr	ACU	1.56	1.55	1.57	1.55	1.56	524	515	526	509	521
Thr	ACC	0.76	0.76	0.75	0.77	0.76	254	254	252	252	255
Thr	ACA	1.2	1.22	1.22	1.2	1.21	403	405	408	395	405
Thr	ACG	0.48	0.48	0.47	0.49	0.47	161	159	157	160	158
Ala	GCU	1.68	1.69	1.69	1.69	1.68	596	597	596	594	595
Ala	GCC	0.67	0.69	0.7	0.69	0.69	238	243	245	241	244
Ala	GCA	1.12	1.11	1.1	1.09	1.11	396	390	386	383	394
Ala	GCG	0.53	0.51	0.52	0.53	0.52	188	181	183	187	184
Tyr	UAU	1.59	1.59	1.59	1.6	1.59	760	753	757	746	758
Tyr	UAC	0.41	0.41	0.41	0.4	0.41	193	196	193	188	196
Stp	UAA	1.76	1.77	1.76	1.76	1.72	51	52	51	51	50
Stp	UAG	0.72	0.68	0.76	0.76	0.79	21	20	22	22	23
Stp	UGA	0.52	0.55	0.48	0.48	0.48	15	16	14	14	14
His	CAU	1.46	1.47	1.46	1.46	1.47	476	474	473	463	475
His	CAC	0.54	0.53	0.54	0.54	0.53	176	173	173	172	171
Gln	CAA	1.53	1.53	1.54	1.52	1.53	710	714	715	688	719
Gln	CAG	0.47	0.47	0.46	0.48	0.47	216	217	216	215	218
Asn	AAU	1.51	1.52	1.51	1.53	1.51	968	964	962	938	968
Asn	AAC	0.49	0.48	0.49	0.47	0.49	316	307	311	288	312
Lys	AAA	1.46	1.45	1.45	1.48	1.45	1052	1027	1038	1012	1034
Lys	AAG	0.54	0.55	0.55	0.52	0.55	388	391	389	360	390
Asp	GAU	1.58	1.58	1.58	1.58	1.58	860	855	857	835	863
Asp	GAC	0.42	0.42	0.42	0.42	0.42	226	225	226	222	226
Glu	GAA	1.49	1.48	1.48	1.5	1.49	1035	1022	1026	1010	1025
Glu	GAG	0.51	0.52	0.52	0.5	0.51	357	356	357	340	355
Cys	UGU	1.48	1.45	1.45	1.45	1.45	226	224	223	218	225
Cys	UGC	0.52	0.55	0.55	0.55	0.55	80	85	85	82	85
Trp	UGG	1	1	1	1	1	442	444	446	413	446
Arg	CGU	1.15	1.15	1.16	1.16	1.15	315	314	316	308	315
Arg	CGC	0.49	0.48	0.48	0.47	0.48	133	130	131	126	131
Arg	CGA	1.42	1.4	1.39	1.41	1.4	389	381	380	374	383
Arg	CGG	0.49	0.5	0.5	0.49	0.5	135	135	137	130	138
Arg	AGA	1.78	1.78	1.79	1.81	1.79	486	485	488	481	490
Arg	AGG	0.67	0.69	0.68	0.66	0.68	182	187	187	175	187
Gly	GGU	1.23	1.22	1.22	1.25	1.23	551	546	546	550	550
Gly	GGC	0.42	0.41	0.41	0.41	0.41	189	183	185	183	183
Gly	GGA	1.58	1.59	1.59	1.58	1.59	708	712	711	696	712
Gly	GGG	0.77	0.77	0.78	0.76	0.77	347	346	347	337	346
							26512	26367	26430	25825	26485
