# Supplementary material for: Comparative Chloroplast Genomes and Phylogenetic Analyses of Zanthoxylum L. Provide Insights into Species Delimitation and Phylogenetic Relationships
Source: Research Square preprint supplement (doi:10.21203/rs.3.rs-2188002/v1), 2022-11-14
Supplement: Supplementary file 3 [file 7bd9845f54b4c45f2a26d515.xlsx]

## Sheet: Sheet1
Table S5. Types and amounts of SSRs in the five chloroplast genomes.
SSR Type	Repeat unit	Amount					Ratio
		Z. nitidum	Z. piasezkii	Z. bungeanum	Z. ailanthoides	Z. armatum	Z. nitidum	Z. piasezkii	Z. bungeanum	Z. ailanthoides	Z. armatum
Mono	A/T	166	173	172	156	177	0.97076	0.961111	0.966292	0.962963	0.967213
	C/G	5	7	6	6	6	0.0292398	0.0388889	0.0337079	0.037037	0.0327869
Di	AG/CT	0	0	0	1	6	0	0	0	0.2	1
	AT/TA	5	6	5	4	0	1	1	1	0.8	0
Tri	AAC/GTT	6	5	5	6	5	0.0810811	0.0704225	0.0714286	0.0833333	0.0694444
	AAG/CTT	25	25	25	24	25	0.337838	0.352113	0.357143	0.333333	0.347222
	AAT/ATT	26	25	25	27	25	0.351351	0.352113	0.357143	0.375	0.347222
	ACC/GGT	2	2	2	2	2	0.027027	0.028169	0.0285714	0.0277778	0.0277778
	ACT/AGT	2	2	2	2	2	0.027027	0.028169	0.0285714	0.0277778	0.0277778
	AGC/CTG	6	5	4	6	6	0.0810811	0.0704225	0.0571429	0.0833333	0.0833333
	AGG/CCT	2	2	2	0	2	0.027027	0.028169	0.0285714	0	0.0277778
	ATC/ATG	5	5	5	5	5	0.0675676	0.0704225	0.0714286	0.0694444	0.0694444
Tetra	AAAC/GTTT	0	0	1	0	0	0	0	0.142857	0	0
	AAAG/CTTT	0	0	0	0	0	0	0	0	0	0
	AAAT/ATTT	3	3	3	3	3	0.5	0.428571	0.428571	0.428571	0.428571
	AACT/AGTT	0	1	1	1	1	0	0.142857	0.142857	0.142857	0.142857
	AATC/ATTG	0	0	0	0	0	0	0	0	0	0
	AATG/ATTC	1	1	0	0	1	0.166667	0.142857	0	0	0.142857
	ACAT/ATGT	1	1	1	1	1	0.166667	0.142857	0.142857	0.142857	0.142857
	AATT/AATT	1	0	0	1	0	0.166667	0	0	0.142857	0
	AAGG/CCTT	0	0	0	0	0	0	0	0	0	0
	AGAT/ATCT	0	1	1	1	1	0	0.142857	0.142857	0.142857	0.142857
		256	264	260	246	268
