# Supplementary material for: Comparative Chloroplast Genomes and Phylogenetic Analyses of Zanthoxylum L. Provide Insights into Species Delimitation and Phylogenetic Relationships
Source: Research Square preprint supplement (doi:10.21203/rs.3.rs-2188002/v1), 2022-11-14
Supplement: Supplementary file 4 [file efcbe8486a584e3067a0b943.xlsx]

## Sheet: T S3
Table S4. Repeat distribution statistic analysis of five Zanthoxylum species plastomes. F: forward repeat; R: reverse repeat; C: complementary repeat; P: palindrome repeat, respectively.
Taxon	Directions	20-29	30-39	40-49	＞49
Z. armatum	F	57	2	4	1
	R	35	0	0	0
	P	56	3	7	1
	C	24	0	0	0
Z. ailanthoides	F	58	4	5	3
	R	23	0	0	0
	P	58	8	7	3
	C	17	0	0	0
Z. nitidum	F	64	6	5	1
	R	50	0	0	0
	P	73	7	7	1
	C	37	0	0	0
Z. bungeanum	F	49	2	4	1
	R	27	0	0	0
	P	47	2	7	1
	C	19	0	0	0
Z. piasezkii	F	61	3	4	1
	R	46	0	0	0
	P	65	5	7	1
	C	38	0	0	0
